# Supplementary material for: Targeted Metabolomics Reveals Abnormal Hepatic Energy Metabolism by Depletion of β-Carotene Oxygenase 2 in Mice
Source: PubMed Central journal article supplement (PMC5677115; doi:10.1038/s41598-017-15222-x), 2017-11-07
Supplement: 41598_2017_15222_MOESM1_ESM.pdf [file 41598_2017_15222_MOESM1_ESM.pdf]

## **Supplemental Figures**

### **Targeted Metabolomics Reveals Abnormal Hepatic Energy Metabolism by Depletion of $\beta$ -Carotene Oxygenase 2 in Mice**

Lei Wu, Xin Guo, Yi Lyu, Stephen Clarke, Edralin Lucas, Brenda J Smith, Deana Hildebrand, Weiqun Wang, Denis Medeiros, Xinchun Shen, Dingbo Lin

Department of Nutritional Sciences, Oklahoma State University, Stillwater, Oklahoma 74078, USA

Supplemental Table 1 Summary of the numbers of metabolites identified with significant changes in the livers of wild type (WT),  $\beta$ -carotene oxygenase 2 (BCO2) heterozygous, and/or BCO2 knockout (KO) mice

| <b>Statistical Comparisons</b>                                    |                               |                                |                                |
|-------------------------------------------------------------------|-------------------------------|--------------------------------|--------------------------------|
| Welch's Two-Sample<br><i>t</i> -Test                              | $\frac{\text{KO}}{\text{WT}}$ | $\frac{\text{KO}}{\text{Het}}$ | $\frac{\text{Het}}{\text{WT}}$ |
| Total Metabolites<br>( $p \leq 0.05$ , $\uparrow\downarrow$ )     | 250<br>(108   142)            | 250<br>(103   147)             | 99<br>(65   34)                |
| Total Metabolites<br>( $0.05 < p < 0.10$ , $\uparrow\downarrow$ ) | 36<br>(18   18)               | 42<br>(10   32)                | 45<br>(30   15)                |

The numbers in red show metabolites with increased contents, while the numbers in green indicate metabolites with decreased contents

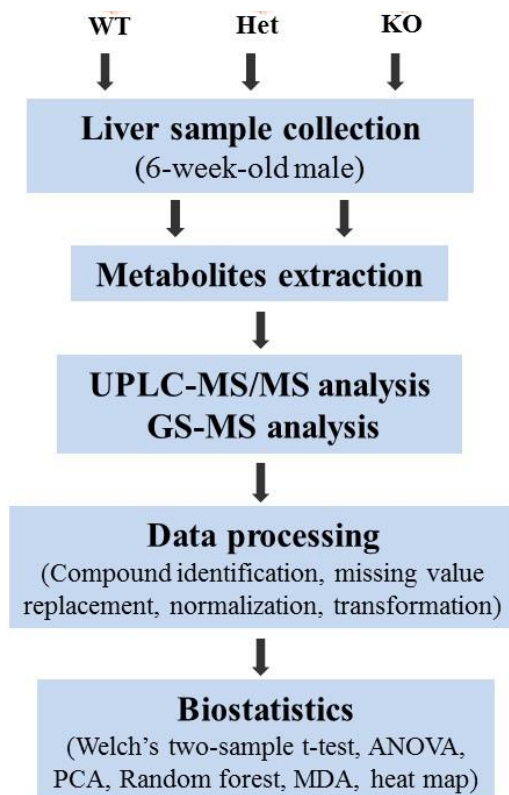

**Supplemental Figure 1. Summary of the experimental design.** Liver metabolites from 6-week-old male wild type (WT),  $\beta$ -carotene oxygenase 2 (BCO2) heterozygous (Het) and BCO2 knockout (KO) mice were subjected to UPLC-MS/MS and GS-MS analysis followed by data processing and biostatistics analysis (n = 6).

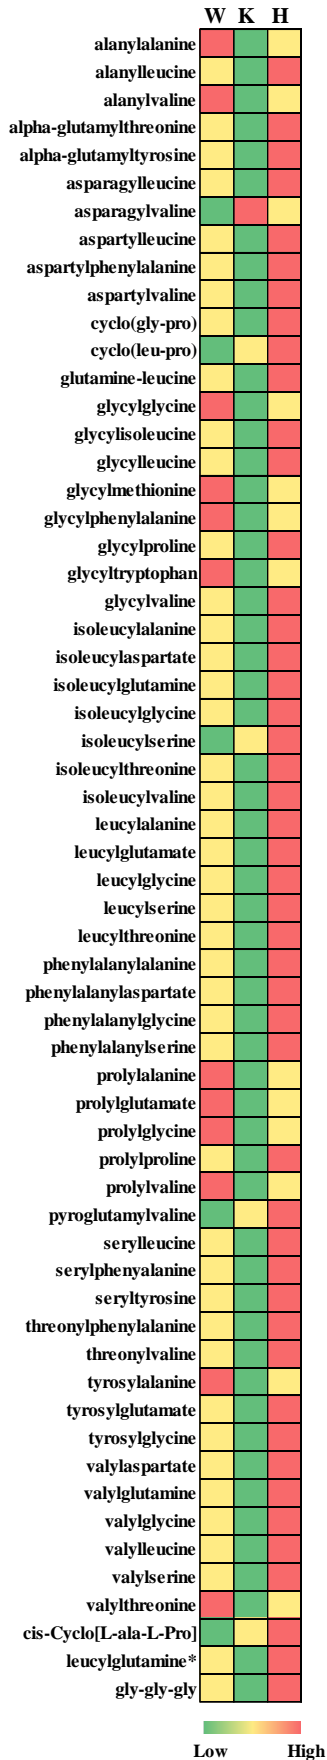

**Supplemental Figure 2. Heat map of metabolites associated with peptides metabolism.** Liver metabolites from 6-week-old male WT, Het and KO mice were subjected to UPLC-MS/MS and GS-MS analysis followed by data processing and biostatistics analysis (n = 6). W, wild type; H,  $\beta$ -carotene oxygenase 2 (BCO2) heterozygous mice; K, BCO2 knockout mice

Low High
